# Supplementary material for: Lipotoxic hepatocytes promote nonalcoholic fatty liver disease progression by delivering microRNA-9-5p and activating macrophages
Source: PubMed Central journal article supplement (PMC8898344; doi:10.7150/ijbs.57610), 2021-08-27
Supplement: ijbsv17p3745s1.pdf [file ijbsv17p3745s1.pdf]

**Table S1** Primer sequences for RT-qPCR

| Target                        | Primer sequence                                                         |
|-------------------------------|-------------------------------------------------------------------------|
| hsa/mmu-miR-9-5p<br>RT primer | GTCGTATCCAGTGCAGGGTCCGAGGTATTCGCACTGGATACGACTC<br>ATAC                  |
| hsa/mmu-miR-9-5p              | F: GCGCCGGTCTTTGGTTATCTAGCT<br>R: CAGTGCAGGGTCCGAGGTAT                  |
| hsa/mmu-U6<br>U6 RT primer    | F: CTCGCTTCGGCAGCACA<br>R: AACGCTTCACGAATTTGCGT<br>AACGCTTCACGAATTTGCGT |
| mmu-TGM2                      | F: GGTAGATGAAGCCCTGTTGC<br>R: GGCCACTTCATCCTGCTCTA                      |
| hsa-TGM2                      | F: GGCGAACCACCTGAACAAAC<br>R: GTGTTGTTGGTGTATGTGGGC                     |
| hsa- $\beta$ -actin           | F: CACTGTGCCCATCTACGAGG<br>R: TAATGTCACGCACGATTTCC                      |
| hsa-IL-6                      | F: CCTGAACCTTCCAAGATGGC<br>R: TTCACCAGGCAAGTCTCCTCA                     |
| hsa-IL-1 $\beta$              | F: ATGATGGCTTATTACAGTGGCAA<br>R: GTCGGAGATTCGTAGCTGGA                   |
| hsa-TNF- $\alpha$             | F: CCAGGGACCTCTCTAATCA<br>R: TCAGCTTGAGGGTTTGCTAC                       |
| mmu-IL- $\beta$               | F: TGCCACCTTTTGACAGTGATG<br>R: TTCTTGTGACCCTGAGCGAC                     |
| mmu-IL-6                      | F: GGGACTGATGCTGGTGACAA<br>R: ACAGGTCTGTTGGGAGTGGT                      |
| mmu-TNF- $\alpha$             | F: AGAAAGCATGATCCGCGAC<br>R: TTGTGAGTGTGAGGGTCTGG                       |
| mmu-iNOS                      | F: CGAAACGCTTCACTTCCAA<br>R: TGAGCCTATATTGCTGTGGCT                      |

**Note:** RT-qPCR, reverse transcription quantitative polymerase chain reaction; miR-9-5p, microRNA-9-5p; TGM2, transglutaminase 2; IL-6, interleukin-6; IL-1 $\beta$ , interleukin-1 $\beta$ ; TNF- $\alpha$ , tumor necrosis factor- $\alpha$ ; iNOS, inducible nitric oxide synthase.

**Table S2** The clinical information of NAFLD patients and healthy individuals

| Parameters                | Healthy individuals (n = 40) | NAFLD (n = 40)<br>(Including NASH) |
|---------------------------|------------------------------|------------------------------------|
| Age                       | 53.80 ± 10.01                | 51.35 ± 8.85                       |
| Male/Female               | 29/11                        | 31/9                               |
| BMI (kg/m <sup>2</sup> )* | 21.96 ± 2.12                 | 28.02 ± 2.10                       |
| AST (U/L)*                | 19.42 ± 2.92                 | 34.40 ± 6.38                       |
| ALT (U/L) *               | 19.91 ± 2.46                 | 46.37 ± 3.03                       |
| GGT*                      | 19.58 ± 1.85                 | 77.74 ± 8.93                       |
| TC (mmol/L) *             | 4.34 ± 0.73                  | 5.43 ± 0.68                        |
| TG (mmol/L)*              | 1.23 ± 0.26                  | 2.21 ± 0.23                        |
| HDL-C (mmol/L) *          | 1.29 ± 0.16                  | 1.98 ± 0.62                        |
| LDL-C (mmol/L) *          | 2.53 ± 0.33                  | 3.76 ± 0.53                        |

**Note:** \*  $p < 0.05$  vs. healthy individuals. BMI, body mass index; AST, aspartate aminotransferase; ALT, alanine aminotransferase; GGT, glutamyltranspeptidase; TC, total cholesterol; TG, triglyceride; HDL-C, high density lipoprotein cholesterol; LDL-C, low density lipoprotein cholesterol.
